# Supplementary material
Source: JCI journal article supplement (doi:10.1172/jci163347)
Supplement: sd1 [file 1]

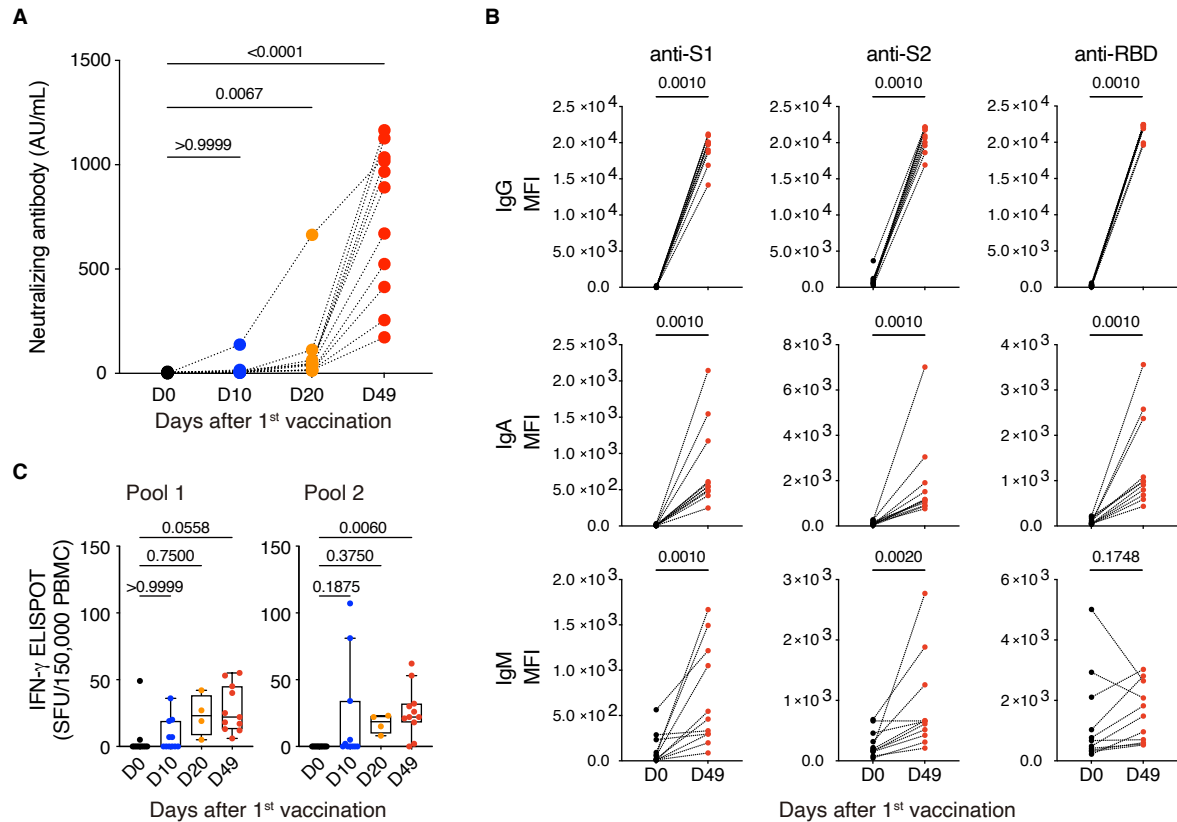

**Supplemental Figure 1. The BNT162b2 mRNA vaccine induces humoral and cellular immunity.** (A) Titers of neutralizing antibodies against SARS-CoV-2 in serum measured by a chemiluminescence immunoassay before (D0, n = 11) and after (D10, n = 11; D20, n = 5; D49, n = 11) BNT162b2 mRNA vaccination. (B) Serum anti-SARS-CoV-2 antigen-specific (spike subunit 1 (S1), spike subunit 2 (S2), and receptor-binding domain (RBD)) IgG, IgA, and IgM, quantified by a bead-based multiplex assay. The data represent the MFI before (D0, n = 11) and after (D49, n = 11) vaccination. (C) IFN- $\gamma$  ELISPOT assay performed with PBMCs collected before (D0, n = 11) and after (D10, n = 11; D20, n = 4; D49, n = 11) vaccination. Pool 1 (left) contained only peptides covering the S1 domain, and Pool 2 (right) contained a mixture of peptides covering some of the S1 domain and peptides covering the RBD and S2 domain. The data represent SFU per 150,000 PBMCs. In all graphs, each dot represents an individual. Black, blue, orange, and red dots represent D0, D10, D20, and D49, respectively (A to C). The box chart indicates the median (middle) and 25th and 75th percentiles (lower and upper), and whiskers indicate the range in all box plots (B). MFI, median fluorescence intensity; ELISPOT, enzyme-linked immunospot; SFU, spot-forming unit. Friedman test followed by Dunn's multiple comparison test was used for all statistical analyses, and each time point (D10, D20, and D49) was compared with the baseline (D0) (A). The two-tailed Wilcoxon matched-pairs signed rank test was used for all statistical analyses (B and C). Bonferroni adjustment was used for multiple comparisons, and each time point (D10, D20, and D49) was compared with the baseline (D0) (C).

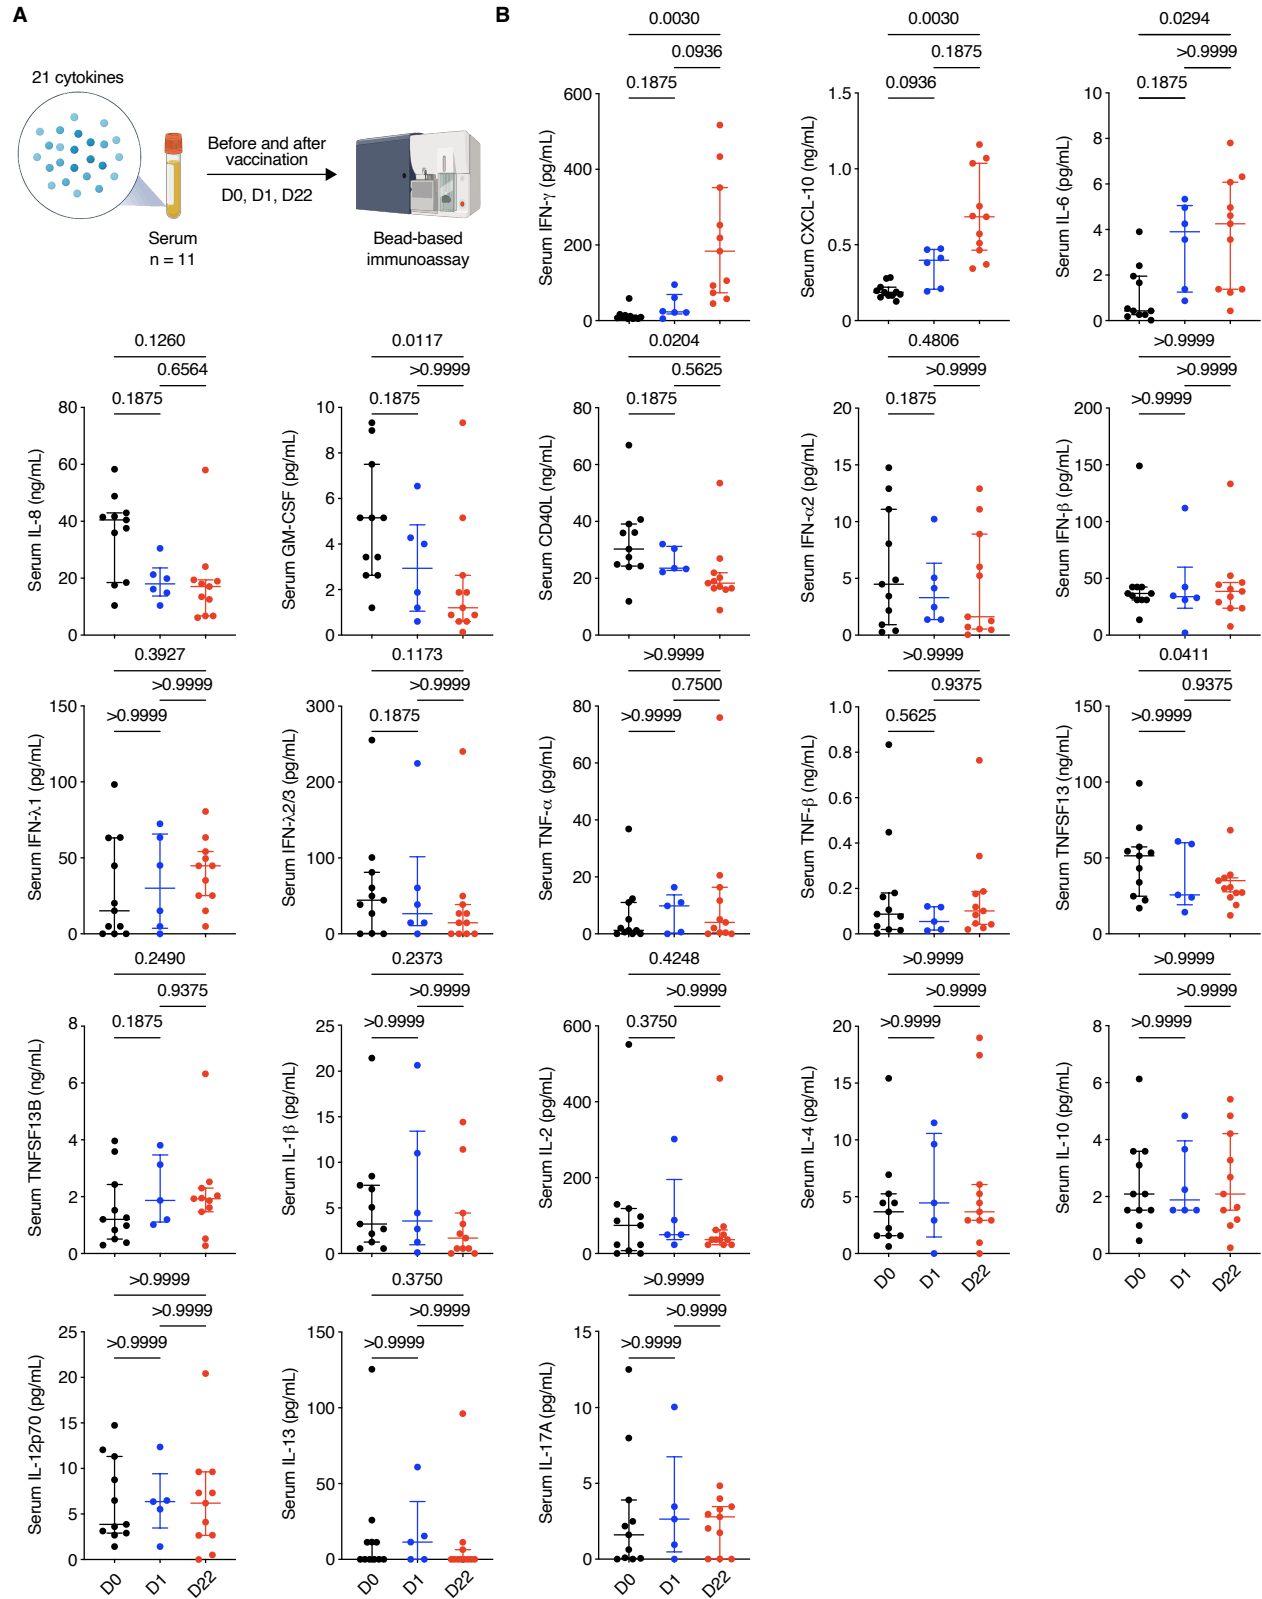

**Supplemental Figure 2. Interferon-related cytokines are produced in greater amounts in response to booster vaccination. (A) Overview of the experiment. (B) Concentrations of 21**

cytokines in serum samples obtained from participants before (D0, n = 11, black) and the day after (D1, n = 6, blue; D22, n = 11, red) BNT162b2 mRNA vaccination, as measured by bead-based immunoassays. In all graphs, each dot represents an individual. Data are shown as the median with the 25th and 75th percentiles. The two-tailed Wilcoxon matched-pairs signed rank test with Bonferroni multiple corrections was used for all statistical analyses, and each time point (D20 and D49) was compared with the baseline.

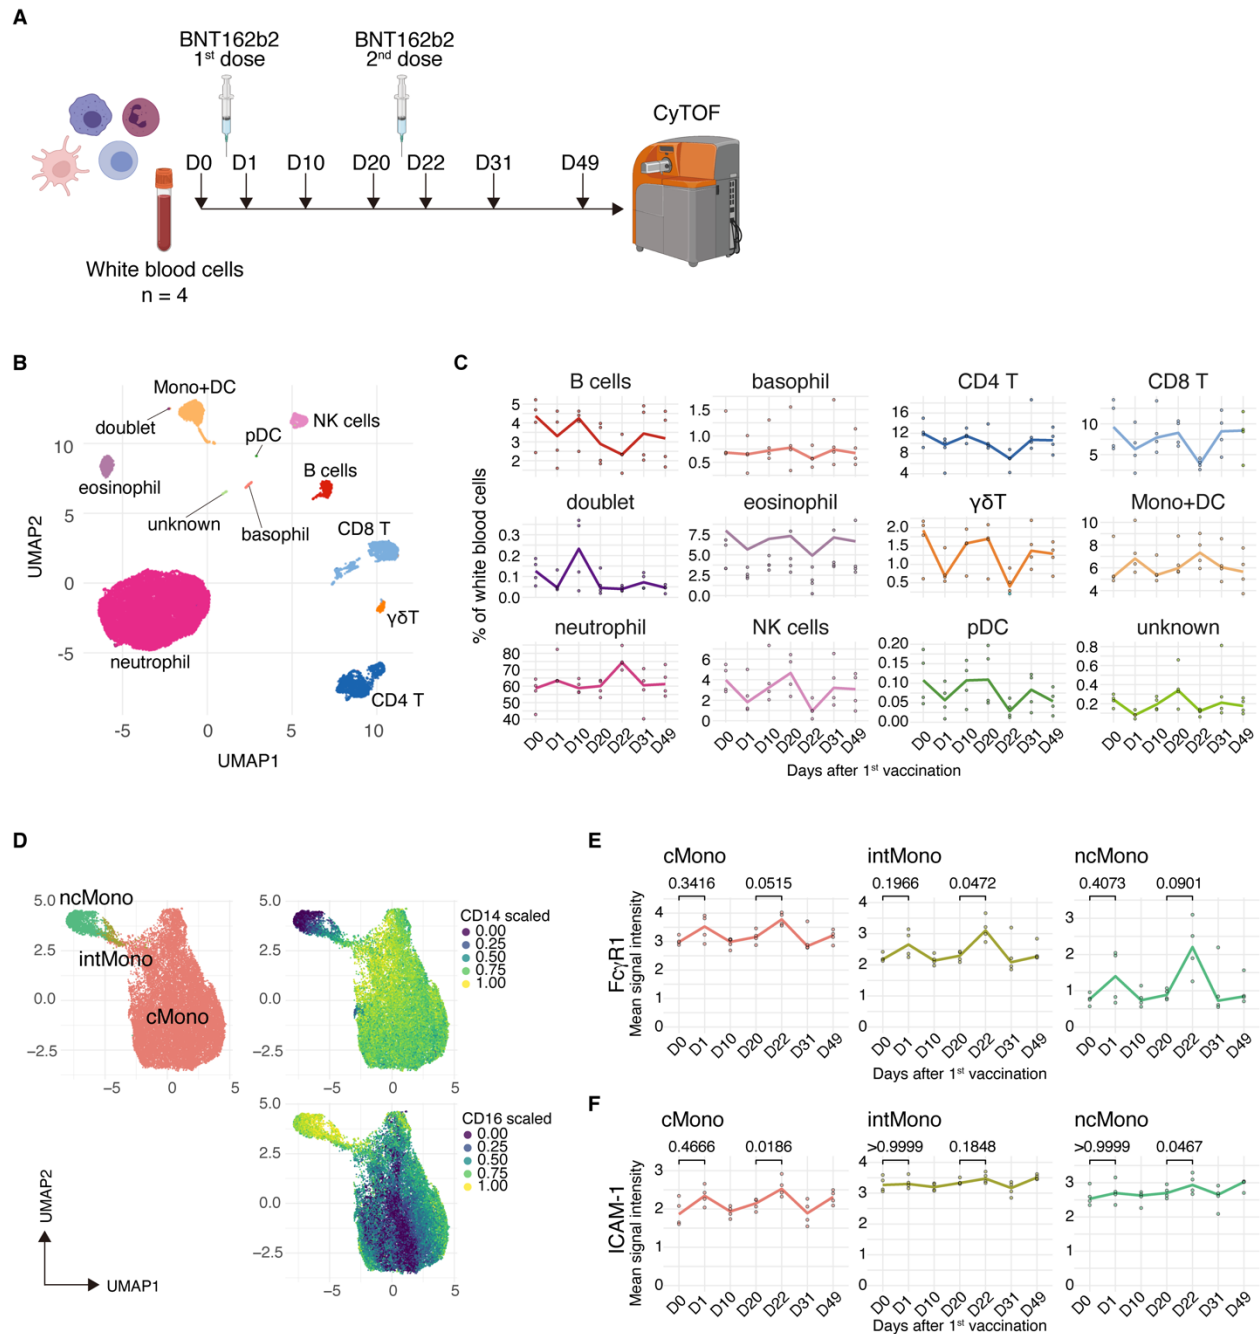

**Supplemental Figure 3. CyTOF analysis of monocytes over time.** (A) Overview of the CyTOF analysis experiments. Whole blood samples were collected from healthy donors (n = 4) at seven time points and analyzed using CyTOF. (B) UMAP showing all identified cell clusters in white blood cells. (C) Changes over time in the percentage of each immune cell among white blood cells. (D) UMAP clustering of monocytes identified from whole blood samples using CyTOF and UMAP showing the expression levels of CD14 and CD16 in each monocyte cluster. (E and F) Changes over time in the expression of Fc $\gamma$ R1 (E) and ICAM-1 (F) on classical monocytes (cMono), intermediate monocytes (intMono), and nonclassical monocytes (ncMono), respectively. Statistical analysis was performed using a repeated-measures ANOVA with a Greenhouse-Geisser correction and a Bonferroni post hoc test.

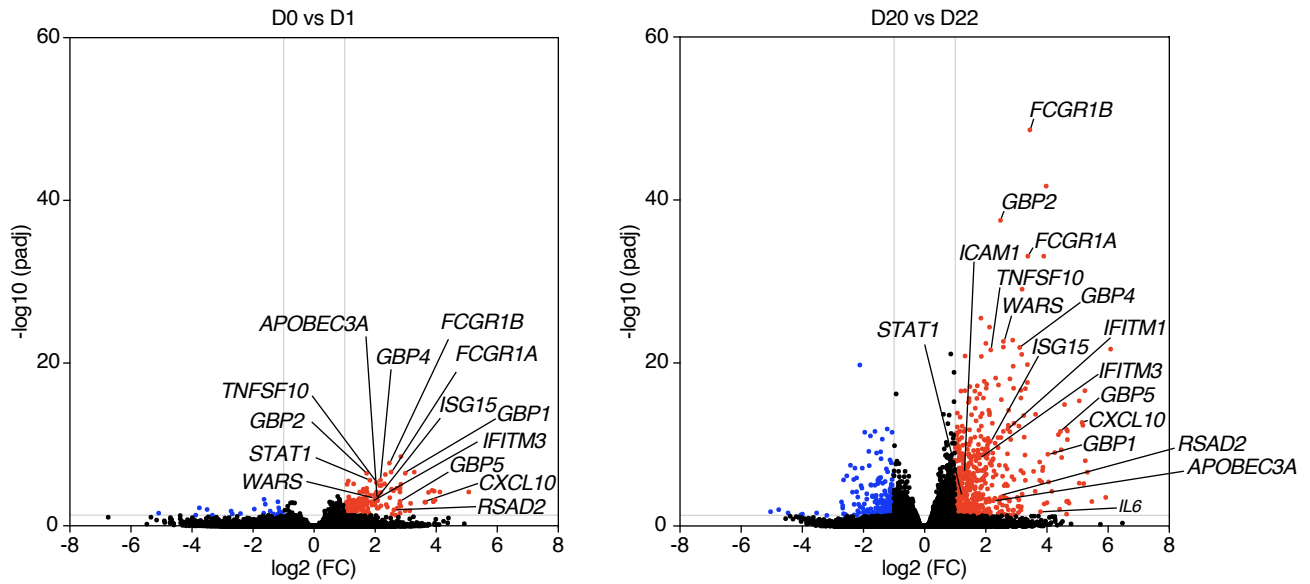

**Supplemental Figure 4. The BNT162b2 mRNA vaccine enhanced antiviral and IFN-stimulated gene expression in monocytes.** Volcano plot of differentially expressed genes detected by RNA sequencing before and after the first and second vaccination, identified by comparing D1 and D22 to D0 and D20, respectively. Significantly upregulated genes and downregulated genes are indicated by red and blue, respectively (absolute  $\log_2\text{-FC} > 1$  and  $p.\text{adjust} < 0.05$ ). x-axis,  $\log_2\text{-fold change}$ ; y-axis,  $\log_{10}$  adjusted p value.

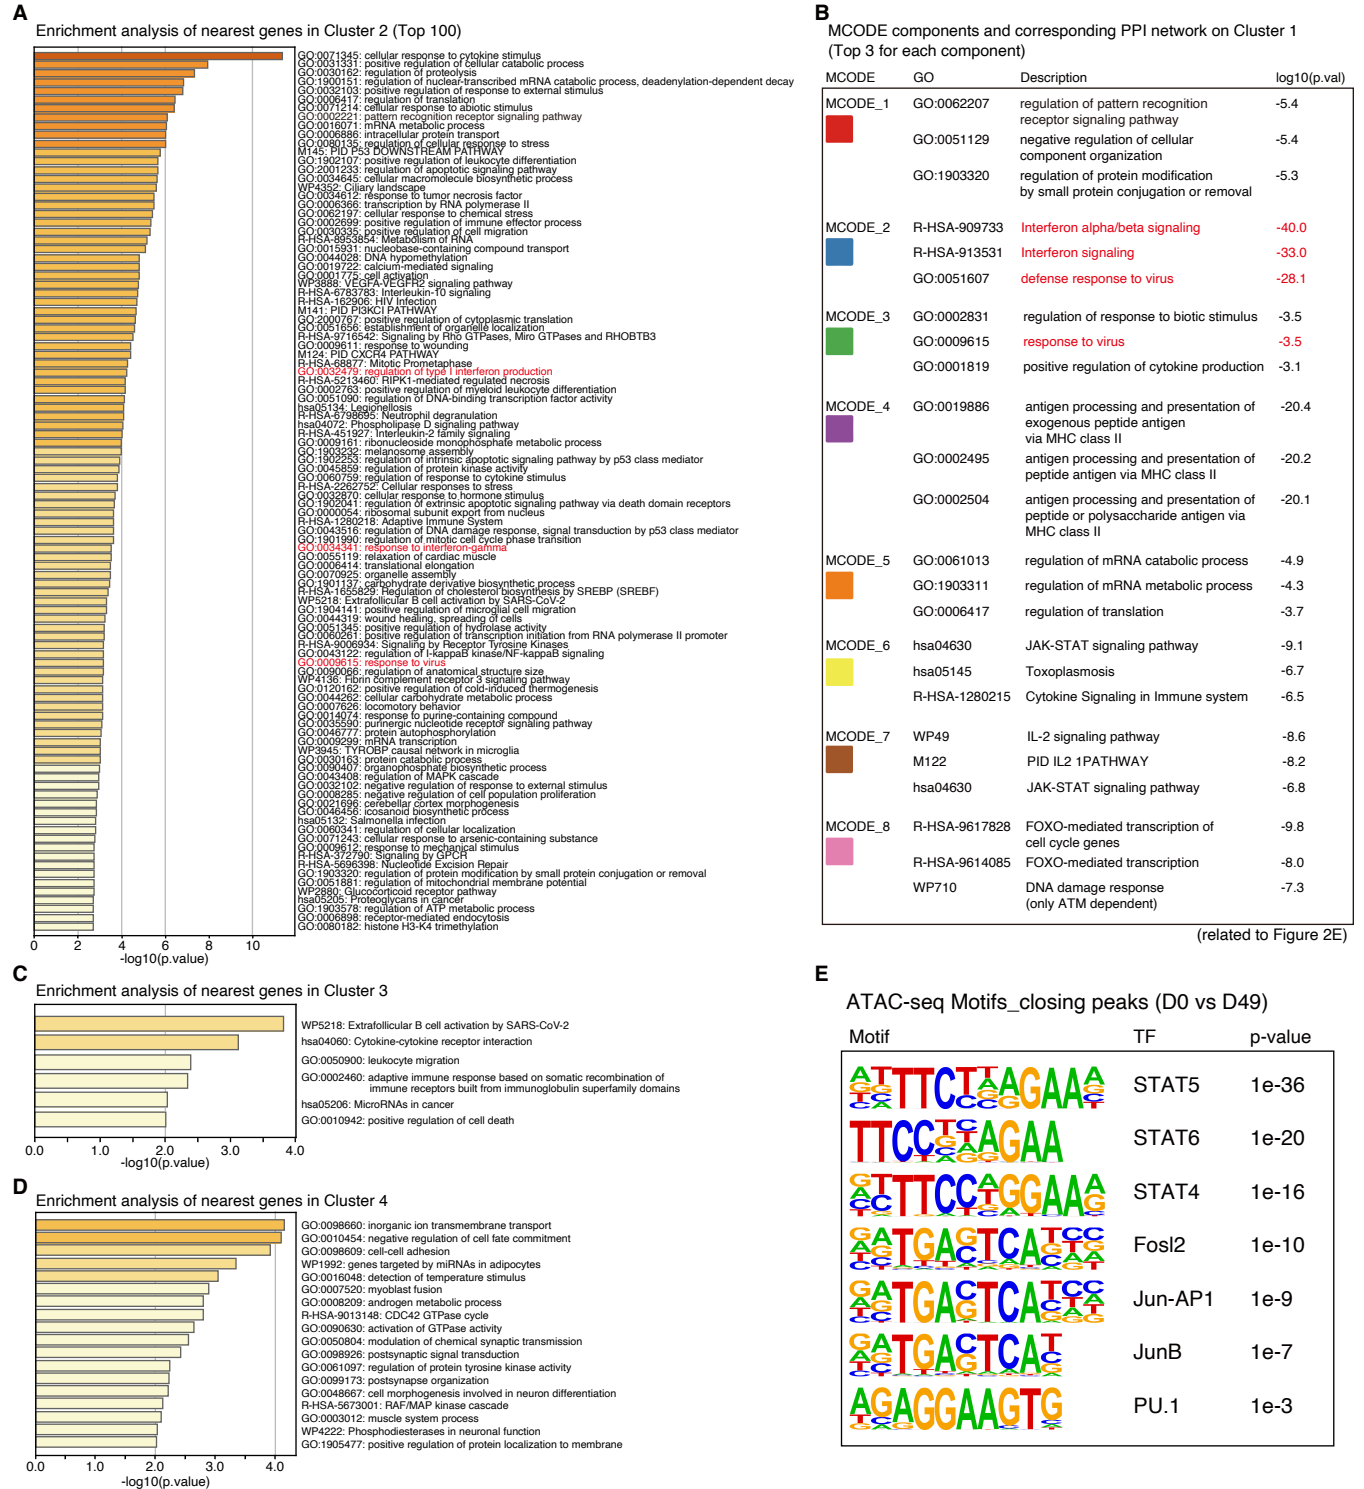

**Supplemental Figure 5. Enrichment analysis of ATAC-seq data. (A)** Enrichment analysis of the nearest genes detected in cluster 2 of ATAC-seq data conducted with Metascape (<https://metascape.org>). The top 100 terms are listed. Innate immune response terms are marked in red. **(B)** MCODE components identified by protein-protein interaction enrichment analysis using Metascape (<https://metascape.org>) (associated with Fig. 2E). The three best-scoring terms by p value are listed. **(C and D)** Enrichment analysis of the nearest genes detected in clusters 3

(C) and 4 (D) of ATAC-seq data conducted with Metascape (<https://metascape.org>). (E) Known TF binding motifs related to interferon and cytokine production in less accessible regions. The differentially accessible regions were identified in isolated monocytes on D49 compared to D0 (n = 5 per group) using ATAC-seq. TF motifs were detected by hypergeometric optimization of motif enrichment (HOMER) analysis.

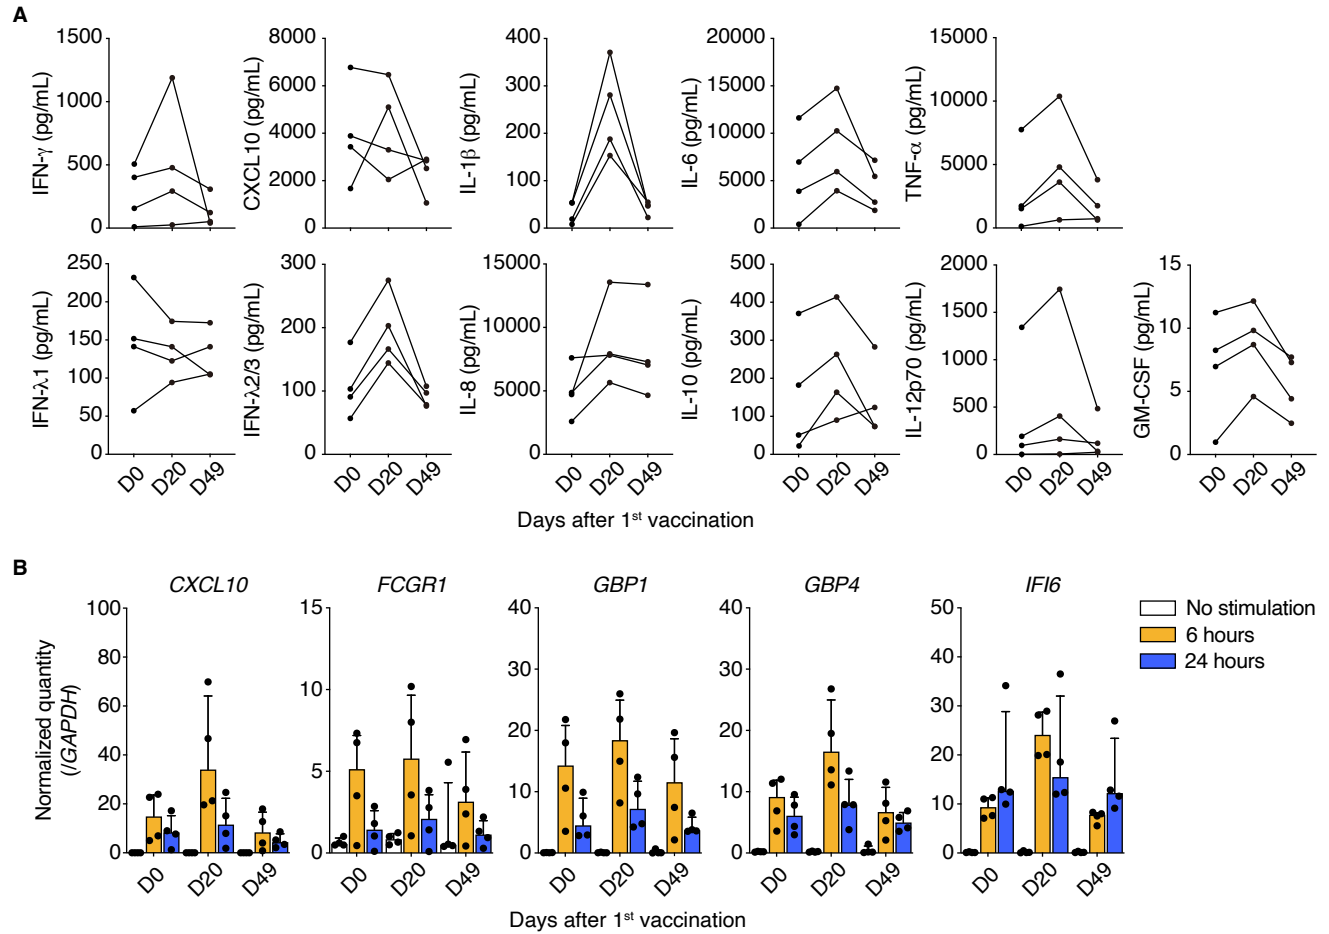

**Supplemental Figure 6. Cytokine production and gene expression in monocytes induced by a TLR7/TLR8 agonist.** (A) Concentrations of cytokines (IFN- $\gamma$ , CXCL-10, IL-1 $\beta$ , IL-6, TNF- $\alpha$ , IFN- $\lambda$ 1, IFN- $\lambda$ 2/3, IL-8, IL-10, IL-12p70, and GM-CSF) in the culture supernatant after stimulation of isolated monocytes with R848 for 24 hours (D0, D20, and D49; n = 4 per group), as measured by a bead-based immunoassay. Each dot represents an individual. (B) Antiviral and IFN-stimulated gene (*CXCL10*, *FCGR1*, *GBP1*, *GBP4*, and *IFI6*) expression levels were quantified by qPCR before and after stimulation of isolated monocytes with R848 (100 ng/mL) for 6 and 24 hours (left bars, D0; middle bars, D20; right bars, D49; n = 4 per group). The gene expression levels were normalized to those of *GAPDH*. Each dot represents an individual. White, orange, and blue bars show no stimulation, 6 hours and 24 hours after stimulation. ISGs, IFN-stimulated genes.

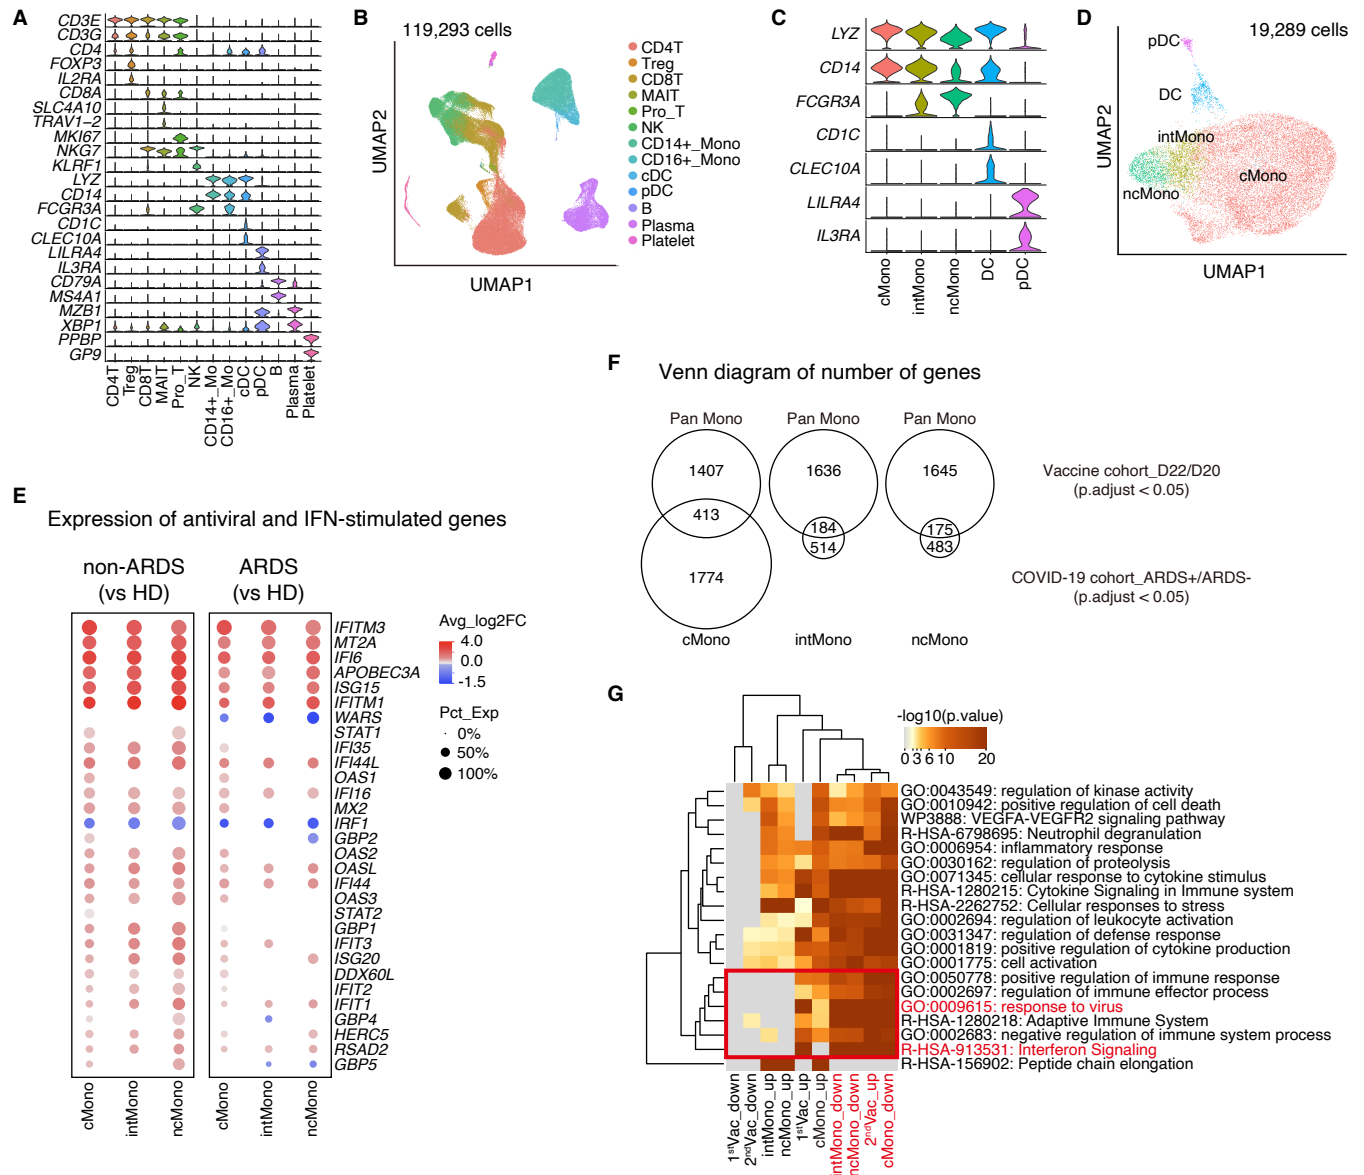

**Supplemental Figure 7. scRNA-seq of unvaccinated COVID-19 patients.** (A) Violin plots representing the expression of cell markers in 13 clusters. (B) UMAP representing all 119,293 cells with manually annotated cell types. (C) Violin plots representing the expression of cell markers of innate immune cells (myeloid cells + pDCs) in 5 clusters. (D) UMAP clustering of innate immune cells (myeloid cells + pDC) identified by scRNA-seq analysis, colored by manually annotated cell types. (E) Dot plots representing significantly differentially expressed antiviral and interferon-stimulated genes in cMono, intMono, and ncMono, comparing non-ARDS COVID-19 patients (left) or COVID-19 patients with ARDS (right) with healthy donors (p.adjust < 0.05). Dot color indicates the average of the log2-FC (Avg\_log2FC), and dot size represents the percentage of cells expressing the gene (Pct\_Exp). (F) Venn diagrams of the number of DEGs in monocytes (cMono, lower left; intMono, lower middle; and ncMono, lower right) identified by scRNA-seq analysis of COVID-19 patients (ARDS versus non-ARDS) and in pan-monocytes (upper) isolated from PBMCs collected before (D20) and after (D22) the second vaccination identified by bulk RNA-seq analysis of vaccinated participants, filtered by p.adjust <

0.05. **(G)** Ontology clusters showing statistically enriched terms using Metascape (<https://metascape.org>). We selected the term with the best p value within each cluster as its representative term, and they are displayed in a dendrogram. The heatmap is colored by p value for each cluster, and gray cells indicated a lack of enrichment for that term in the corresponding gene list. ARDS, acute respiratory distress syndrome; HD, healthy donor; cMono, classical monocytes; intMono, intermediate monocytes; ncMono, nonclassical monocytes; Pan Mono, pan monocytes (including cMono, intMono, and ncMono); 1<sup>st</sup>Vac, D0 vs. D1 (vaccine cohort); 2<sup>nd</sup>VAC, D20 vs. D22 (vaccine cohort); up, upregulated; down, downregulated.

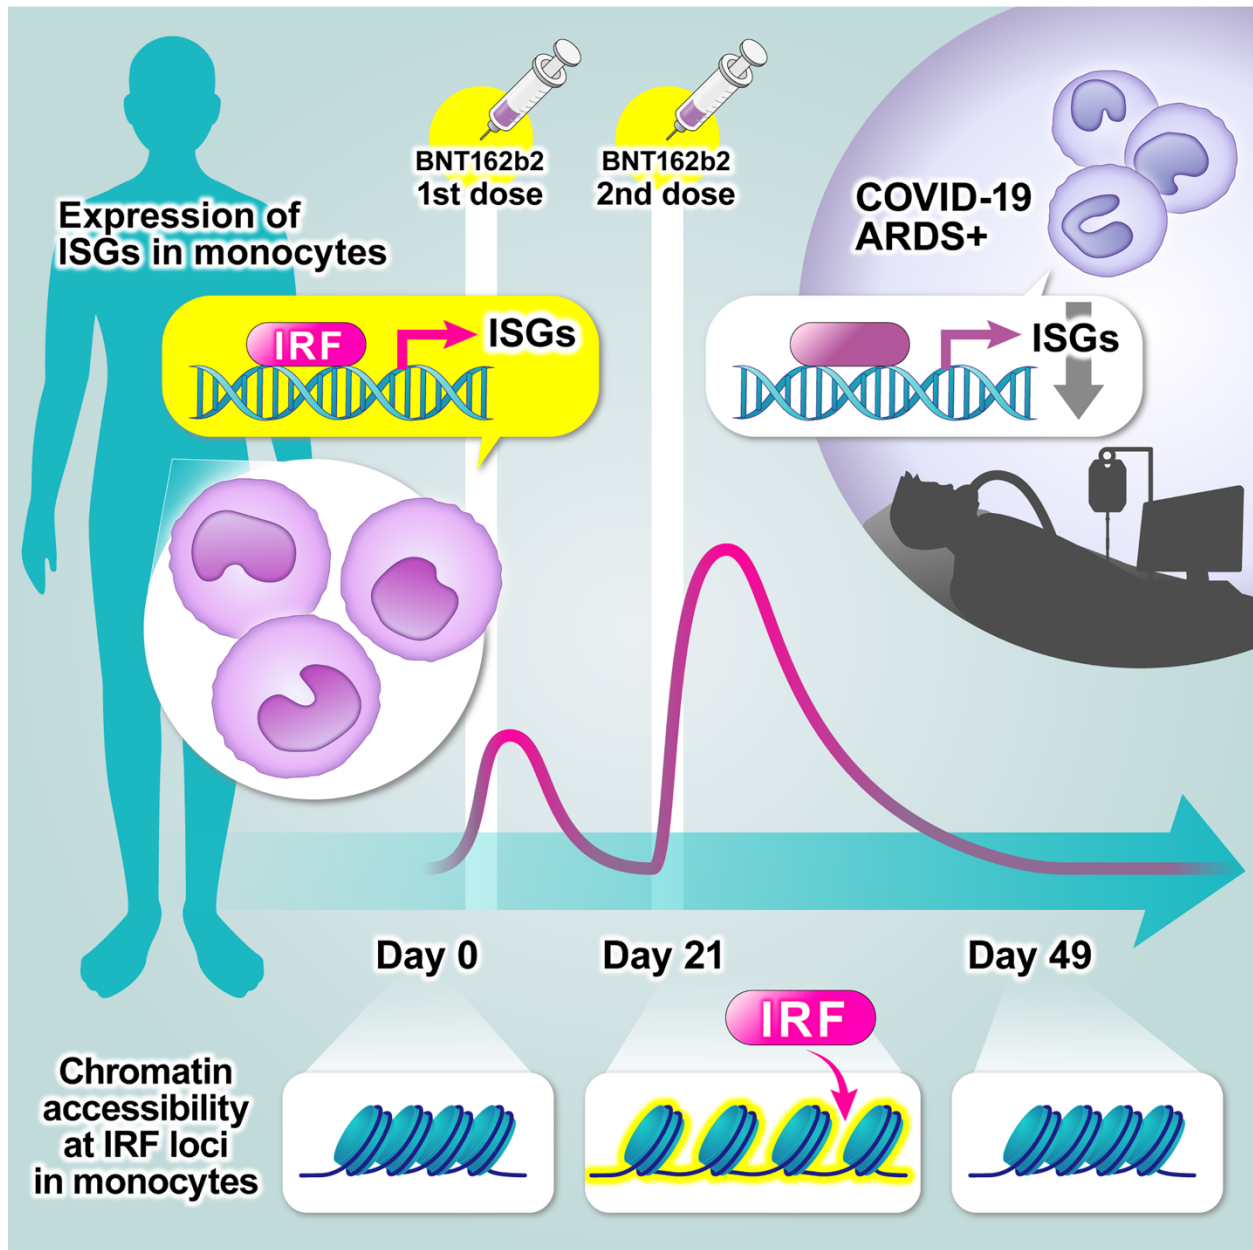

**Supplemental Figure 8. Epigenetic short-term memory of innate immune cells after vaccination and COVID-19.** The short-term epigenetic reprogramming induced by the BNT162b2 mRNA vaccine leads to a transient enhancement of the type I IFN response in monocytes. Unvaccinated COVID-19 patients, especially those with ARDS, had impaired the expression of ISGs, which were strongly correlated with the genes upregulated vaccination. ARDS, acute respiratory distress syndrome; IRF, interferon-regulatory factor; ISG, IFN-stimulated gene.

**Supplemental Table 1. Healthy donor characteristics in the vaccine study.**

| Sample         | Donor | Sex  | Age (years) | BMI  | SARS-CoV-2 Infection | CytoTOF (Fig. 1) | RNA-seq (Fig. 1) | ATAC-seq (Fig. 2) | Restimulation (Fig. 3) |
|----------------|-------|------|-------------|------|----------------------|------------------|------------------|-------------------|------------------------|
| Serum/PBMC     | HD_01 | Male | 32          | 22.1 | No                   | No               | No               | No                | No                     |
| Serum/PBMC     | HD_02 | Male | 31          | 20   | No                   | No               | No               | No                | No                     |
| Serum/PBMC/WBC | HD_03 | Male | 36          | 22.2 | No                   | Yes              | Yes              | Yes               | Yes                    |
| Serum/PBMC     | HD_04 | Male | 35          | 22.7 | No                   | No               | No               | No                | No                     |
| Serum/PBMC/WBC | HD_05 | Male | 42          | 22.5 | No                   | Yes              | Yes              | Yes               | No                     |
| Serum/PBMC     | HD_06 | Male | 33          | 20.1 | No                   | No               | No               | No                | No                     |
| Serum/PBMC     | HD_07 | Male | 38          | 24.7 | No                   | No               | No               | No                | No                     |
| Serum/PBMC     | HD_08 | Male | 34          | 24.1 | No                   | No               | No               | Yes               | Yes                    |
| Serum/PBMC     | HD_09 | Male | 40          | 23.9 | No                   | No               | No               | No                | No                     |
| Serum/PBMC/WBC | HD_10 | Male | 37          | 23.1 | No                   | Yes              | Yes              | Yes               | Yes                    |
| Serum/PBMC/WBC | HD_11 | Male | 42          | 24.5 | No                   | Yes              | Yes              | Yes               | Yes                    |

**Supplemental Table 2. Donor characteristics in the unvaccinated COVID-19 patient study for scRNA-seq analysis.** COPD, chronic obstructive pulmonary disease; CO, coronavirus disease 2019 (COVID-19); DCM, dilated cardiomyopathy; DL, dyslipidemia; DM, type 2 diabetes mellitus; HC, healthy control; HT, hypertension; IP, Interstitial pneumonia; LAM, lymphangioleiomyomatosis.

| ID                                     | HC_01   | HC_02   | HC_03   | HC_04   | HC_05   | CO_01     | CO_02     | CO_03     | CO_04     | CO_05     | CO_06     | CO_07     | CO_08     | CO_09     | CO_10     | CO_11     | CO_12     | CO_13     | CO_14     | CO_15     | CO_16     |           |           |
|----------------------------------------|---------|---------|---------|---------|---------|-----------|-----------|-----------|-----------|-----------|-----------|-----------|-----------|-----------|-----------|-----------|-----------|-----------|-----------|-----------|-----------|-----------|-----------|
| Status                                 | Healthy | Healthy | Healthy | Healthy | Healthy | COVID-19  | COVID-19  | COVID-19  | COVID-19  | COVID-19  | COVID-19  | COVID-19  | COVID-19  | COVID-19  | COVID-19  | COVID-19  | COVID-19  | COVID-19  | COVID-19  | COVID-19  | COVID-19  | COVID-19  |           |
| Severity (WHO classification)          | -       | -       | -       | -       | -       | No        | Severe    | Critical  | Severe    | Critical  | No        | Severe    | Critical  | No        | Severe    | Critical  | No        | Severe    | Critical  | No        | Severe    | Critical  |           |
| ARDS                                   | -       | -       | -       | -       | -       | 55        | 50        | 64        | 82        | 82        | 39        | 78        | 40        | 80        | 80        | 79        | 56        | 80        | 80        | 73        | 64        | 58        |           |
| Age (years)                            | 55      | 62      | 60      | 64      | 58      | 50        | 64        | 82        | 82        | 39        | 78        | 40        | 80        | 80        | 79        | 56        | 80        | 80        | 73        | 64        | 58        |           |           |
| Sex                                    | Female  | Female  | Male    | Male    | Male    | Male      | Male      | Male      | Male      | Female    | Male      | Male      | Male      | Female    | Male      | Male      | Male      | Male      | Male      | Male      | Female    | Female    |           |
| Body mass index (BMI)                  | NA      | NA      | NA      | NA      | NA      | 24.5      | 24.2      | 23.4      | 23        | 29        | 15.6      | 24.2      | 34.7      | 24.1      | 23.1      | 23.3      | 23.2      | 20        | 22.1      | 22.1      | 49.9      |           |           |
| Smoking (Brinkman index)               | NA      | NA      | NA      | NA      | NA      | 800       | 460       | 800       | 800       | 0         | 18        | 0         | NA        | NA        | 3000      | NA        | NA        | NA        | 580       | NA        | 0         | 0         |           |
| Underlying disease                     | No      | No      | No      | No      | No      | DM, HU    | DCM       | IP, HT    | No        | HT, DM    | LAM       | HT        | HT        | No        | NA        | COPD      | HT, DL    | HT, DL    | HT        | HT        | NA        | Carcinoma |           |
| Clinical outcome                       | -       | -       | -       | -       | -       | Recovered | Recovered | Recovered | Recovered | Recovered | Recovered | Recovered | Recovered | Recovered | Recovered | Recovered | Recovered | Recovered | Recovered | Recovered | Recovered | Recovered | Recovered |
| <b>Blood test</b>                      |         |         |         |         |         |           |           |           |           |           |           |           |           |           |           |           |           |           |           |           |           |           |           |
| White blood cell (x10 <sup>9</sup> /L) | NA      | NA      | NA      | NA      | NA      | 8.55      | 2.84      | 14.78     | 4.84      | 11.66     | 2.15      | 6.35      | 3.68      | 14.23     | 6.62      | 3.06      | 7.01      | 5.81      | 2.92      | 0.82      |           |           |           |
| Hemoglobin (g/L)                       | NA      | NA      | NA      | NA      | NA      | 131       | 114       | 114       | 129       | 103       | 133       | 144       | 142       | 137       | 136       | 145       | 130       | 128       | 121       | 112       |           |           |           |
| Platelet (x10 <sup>9</sup> /L)         | NA      | NA      | NA      | NA      | NA      | 315       | 86        | 175       | 296       | 255       | 138       | 255       | 284       | 217       | 144       | 371       | 192       | 217       | 143       | 144       |           |           |           |
| Neutrophil (%)                         | NA      | NA      | NA      | NA      | NA      | 75.1      | 83.8      | 89.2      | 88.9      | 95.60     | 87.8      | 77.5      | 66.4      | 94.1      | 91        | 91.8      | 89        | 65.1      | 88.1      | 56.1      |           |           |           |
| Lymphocyte (%)                         | NA      | NA      | NA      | NA      | NA      | 17.9      | 13        | 5.9       | 7.6       | 3         | 6.5       | 23.7      | 16.9      | 29.3      | 6.3       | 5.9       | 7.1       | 18.8      | 8.2       | 37.8      |           |           |           |
| Monocyte (%)                           | NA      | NA      | NA      | NA      | NA      | 6.9       | 3.2       | 4.8       | 3.5       | 1.3       | 5.5       | 9.8       | 5.4       | 3.5       | 2.2       | 2         | 2.3       | 3.9       | 15.7      | 2.4       | 4.9       |           |           |
| Eosinophil (%)                         | NA      | NA      | NA      | NA      | NA      | 0.0       | 0.0       | 0.0       | 0.0       | 0.0       | 0.0       | 0.0       | 0.3       | 0.0       | 0.2       | 0.0       | 0         | 0.2       | 0.0       | 0.0       |           |           |           |
| Basophil (%)                           | NA      | NA      | NA      | NA      | NA      | 0.1       | 0         | 0         | 0.0       | 0.1       | 0         | 0.2       | 0.5       | 0.1       | 0.5       | 0.0       | 0         | 0.2       | 0.3       | 1.2       |           |           |           |
| D-dimer (µg/mL)                        | NA      | NA      | NA      | NA      | NA      | 2.94      | 3.01      | 0.75      | 1.35      | 0.64      | 0.82      | 4.49      | 1.33      | 1.58      | 3.76      | 4.53      | 0.98      | 0.59      | 0.81      | 0.97      |           |           |           |
| LDH (IU/L)                             | NA      | NA      | NA      | NA      | NA      | 335       | 395       | 423       | 360       | 289       | 551       | 386       | 318       | 345       | 368       | 644       | 392       | 439       | 305       | 400       | 238       |           |           |
| C-reactive protein (mg/L)              | NA      | NA      | NA      | NA      | NA      | 17.3      | 21.1      | 9.2       | 17.6      | 6.52      | 38.8      | 6.5       | 41.4      | 28.4      | 80.3      | 103       | 48        | 45.7      | 157.4     | 34.3      |           |           |           |
| IgG (g/L)                              | NA      | NA      | NA      | NA      | NA      | 11.09     | 17.48     | 11.07     | 13.78     | 10.24     | 8.74      | 10.87     | 13.32     | 10.59     | 9.42      | 9.76      | 13.54     | 9.98      | 13.54     | 17.97     |           |           |           |
| IgA (g/L)                              | NA      | NA      | NA      | NA      | NA      | 3.65      | 2.98      | 1.46      | 0.57      | 1.99      | 2.96      | 1.73      | 2.34      | 2.35      | 3.18      | 2.02      | 2.14      | 1.41      | 3.44      | 3.93      | 3.91      |           |           |
| IgM (g/L)                              | NA      | NA      | NA      | NA      | NA      | 1.07      | 0.55      | 0.42      | 0.31      | 1.07      | 1.03      | 1.16      | 1.37      | 0.96      | 0.31      | 0.79      | 0.66      | 0.73      | 0.74      | 0.83      |           |           |           |
| Ferritin (ng/mL)                       | NA      | NA      | NA      | NA      | NA      | 2820      | 955       | 387       | 1234      | 151       | 534       | 42        | NA        | NA        | 443       | 507       | 771       | 655       | 1287      | 348       | 847       |           |           |
| <b>PCR test</b>                        |         |         |         |         |         |           |           |           |           |           |           |           |           |           |           |           |           |           |           |           |           |           |           |
| Blood                                  | -       | -       | -       | -       | -       | NA        | Positive  | Positive  | Positive  | Positive  | Negative  | Positive  | Positive  | Positive  | Positive  | Positive  | Negative  | Positive  | Negative  | Positive  | Negative  |           |           |
| Sputum                                 | -       | -       | -       | -       | -       | NA        | Positive  | Positive  | Positive  | Positive  | NA        | Positive  | Positive  | Positive  | Positive  | NA        | Positive  | Positive  | NA        | Positive  | NA        |           |           |
| Nasopharyngeal swab                    | -       | -       | -       | -       | -       | Positive  | NA        | Positive  | Positive  | Positive  | Positive  | Positive  | Positive  | Positive  | Positive  | Positive  | Positive  | Positive  | Positive  | Positive  | Positive  |           |           |

**Supplemental Table 3. Information about the antibody panel used for CyTOF analysis.**

| Isotope/Metal | Target                 | Clone    | Vender   | Cat#     | Conjugation | Concentration |
|---------------|------------------------|----------|----------|----------|-------------|---------------|
| 89Y           | CD45                   | HI30     | Fluidigm | 201325   | commercial  | 1:100         |
| 103Rh         | Cell-ID intercalator   |          | Fluidigm | 201325   | commercial  | 1:100         |
| 106Cd         | IFN- $\alpha\beta$ _R2 | 493715   | R&D      | MAB4015  | in-house    | 1:100         |
| 110Cd         | IFN- $\alpha\beta$ _R1 | 85228    | R&D      | MAB245   | in-house    | 1:100         |
| 111Cd         | NRP-1                  | 446921   | R&D      | MAB3870  | in-house    | 1:100         |
| 112Cd         | ICAM-1                 | BBIG-I1  | R&D      | BBA3     | in-house    | 1:100         |
| 114Cd         | FCGR1                  | 10.1     | R&D      | MAB1257  | in-house    | 1:100         |
| 116Cd         | CXCR1                  | 42705    | R&D      | MAB330   | in-house    | 1:100         |
| 141Pr         | CCR6                   | G034E3   | Fluidigm | 201325   | commercial  | 1:100         |
| 142Nd         | FCAR                   | 488032   | R&D      | MAB3939  | in-house    | 1:100         |
| 143Nd         | CD123                  | 6H6      | Fluidigm | 201325   | commercial  | 1:100         |
| 144Nd         | CD19                   | HIB19    | Fluidigm | 201325   | commercial  | 1:100         |
| 145Nd         | CD4                    | RPA-T4   | Fluidigm | 201325   | commercial  | 1:100         |
| 146Nd         | CD8a                   | RPA-T8   | Fluidigm | 201325   | commercial  | 1:100         |
| 147Sm         | CD11c                  | Bu15     | Fluidigm | 201325   | commercial  | 1:100         |
| 148Nd         | CD16                   | 3G8      | Fluidigm | 201325   | commercial  | 1:100         |
| 149Sm         | CD45RO                 | UCHL1    | Fluidigm | 201325   | commercial  | 1:100         |
| 150Nd         | CD45RA                 | HI100    | Fluidigm | 201325   | commercial  | 1:100         |
| 151Eu         | CD161                  | HP-3G10  | Fluidigm | 201325   | commercial  | 1:100         |
| 152Sm         | CCR4                   | L291H4   | Fluidigm | 201325   | commercial  | 1:100         |
| 153Eu         | CD25                   | BC96     | Fluidigm | 201325   | commercial  | 1:100         |
| 154Sm         | CD27                   | O323     | Fluidigm | 201325   | commercial  | 1:100         |
| 155Gd         | CD57                   | HCD57    | Fluidigm | 201325   | commercial  | 1:100         |
| 156Gd         | CXCR3                  | G025H7   | Fluidigm | 201325   | commercial  | 1:100         |
| 158Gd         | CXCR5                  | J252D4   | Fluidigm | 201325   | commercial  | 1:100         |
| 159Tb         | CD147                  | TRA-1-85 | R&D      | MAB3195  | in-house    | 1:100         |
| 160Gd         | CD28                   | CD28.2   | Fluidigm | 201325   | commercial  | 1:100         |
| 161Dy         | CD38                   | HB-7     | Fluidigm | 201325   | commercial  | 1:100         |
| 162Dy         | CD44                   | IM7      | Fluidigm | 3162030B | commercial  | 1:100         |
| 163Dy         | CD56                   | NCAM16.2 | Fluidigm | 201325   | commercial  | 1:100         |
| 164Dy         | TCR $\gamma\delta$     | B1       | Fluidigm | 201325   | commercial  | 1:100         |
| 165Ho         | Sema4D                 | 758726   | R&D      | MAB74701 | in-house    | 1:100         |
| 166Er         | CD294                  | BM16     | Fluidigm | 201325   | commercial  | 1:100         |
| 167Er         | CCR7                   | G043H7   | Fluidigm | 201325   | commercial  | 1:100         |
| 168Er         | CD14                   | 63D3     | Fluidigm | 201325   | commercial  | 1:100         |
| 169Tm         | Sema6D                 | 257510   | R&D      | MAB2095  | in-house    | 1:100         |
| 170Er         | CD3                    | UCHT1    | Fluidigm | 201325   | commercial  | 1:100         |
| 171Yb         | CD20                   | 2H7      | Fluidigm | 201325   | commercial  | 1:100         |
| 172Yb         | CD66b                  | G10f5    | Fluidigm | 201325   | commercial  | 1:100         |
| 173Yb         | HLA-DR                 | LN3      | Fluidigm | 201325   | commercial  | 1:100         |
| 174Yb         | IgD                    | IA6-2    | Fluidigm | 201325   | commercial  | 1:100         |
| 175Lu         | CXCR2                  | 48311    | R&D      | MAB331   | in-house    | 1:100         |
| 176Yb         | CD127                  | A019D5   | Fluidigm | 201325   | commercial  | 1:100         |
| 209Bi         | PD-L1                  | MIH1     | Fluidigm | 3209014B | commercial  | 1:100         |

**Supplemental Table 4. Primer sequences for quantitative PCR.**

| <b>Gene</b>     | <b>Forward (5'-3')</b>   | <b>Reverse (5'-3')</b>   | <b>NCBI Reference Sequence</b> |
|-----------------|--------------------------|--------------------------|--------------------------------|
| <i>APOBEC3A</i> | GACAATGGCACCTCGGTCAAGA   | CCAACCTGCAAAGAAGGAACCAGG | NM_145699                      |
| <i>CXCL10</i>   | TTCCTGCAAGCCAATTTTGT     | TTCTTGATGGCCTTCGATTC     | NM_001565                      |
| <i>FCGR1</i>    | ATACAGGTGCCAGAGAGGTCTC   | CCAGCTTATCCTTCCACGCATG   | NM_000566                      |
| <i>GAPDH</i>    | GTCTCCTCTGACTTCAACAGCG   | ACCACCCTGTTGCTGTAGCCAA   | NM_002046                      |
| <i>GBP1</i>     | TATTGCCCACTATGAACAGCAGAT | TAGCTGGGCCGCTAACTCC      | NM_002053.3                    |
| <i>GBP4</i>     | TAAGCGGCTTTCAGAGCACC     | GACCTCGTTTGCCTTAACTCC    | NM_052941.5                    |
| <i>GBP5</i>     | CTGTCTGCCATTACGCAACCTG   | GTGTGAGACTGCACCGTAGATG   | NM_001134486                   |
| <i>IFI6</i>     | TGATGAGCTGGTCTGCGATCCT   | GTAGCCCATCAGGGCACCAATA   | NM_022873                      |
| <i>IFITM1</i>   | GGCTTCATAGCATTGCGCTACTC  | AGATGTTGAGGCACCTGGCGGT   | NM_003641                      |
| <i>ISG15</i>    | CGCAGATCACCCAGAAGATCG    | TTCGTCGCATTTGTCCACCA     | NM_005101.4                    |
| <i>TNFSF10</i>  | TGGCAACTCCGTCAGCTCGTTA   | AGCTGCTACTCTCTGAGGACCT   | NM_003810                      |
| <i>WARS</i>     | GGACATCATCGCCTGTGGCTTT   | AGTCGCTGTCAGTGAAGCCGAA   | NM_004990                      |
